# Supplementary material for: CRISPR-Cas9-Mediated In Vivo Gene Integration at the Albumin Locus Recovers Hemostasis in Neonatal and Adult Hemophilia B Mice
Source: PubMed Central journal article supplement — Mol Ther Methods Clin Dev. 2020 Jun 30;18:520–31. doi: 10.1016/j.omtm.2020.06.025 (PMC7393320; doi:10.1016/j.omtm.2020.06.025), 2020-06-30
Supplement: mmc1.pdf [file mmc1.pdf]

OMTM, Volume 18

## Supplemental Information

### **CRISPR-Cas9-Mediated *In Vivo* Gene Integration at the Albumin Locus Recovers Hemostasis in Neonatal and Adult Hemophilia B Mice**

**Qingnan Wang, Xiaomei Zhong, Qian Li, Jing Su, Yi Liu, Li Mo, Hongxin Deng, and Yang Yang**

## Supplementary Figures

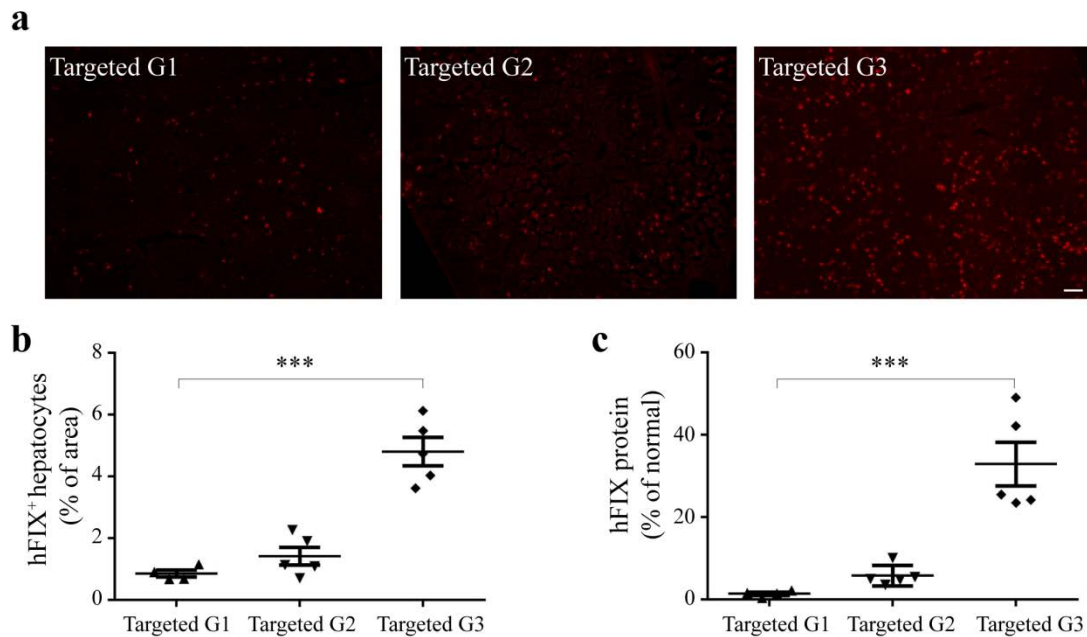

### Supplemental Figure 1 Vector dose optimization to improve *in vivo* gene integration.

Hemophilia B mice (8 weeks old) received tail vein injection of  $9 \times 10^{10}$  GC AAV8.SpCas9 and either  $9 \times 10^{10}$  (G1, n=4),  $2.7 \times 10^{11}$  (G2, n=5), or  $4.5 \times 10^{11}$  (G3, n=5) GC of AAV8.sgRNA.donor vector. Liver samples were collected 4 weeks post vector treatment for analysis. (a) Immunofluorescence staining with antibodies against hFIX (red) on liver sections. Stained cells typically showed as single integrated hepatocytes. Scale bar, 100  $\mu$ m. (b) Quantification of gene correction based on the percentage of area on liver sections expressing hFIX by immunostaining. (c) Plasma hFIX was measured by ELISA at 4 weeks after the dual AAVs treatment. Mean  $\pm$  SEM are shown. \*\*\*  $P < 0.001$ , Dunnett's test.

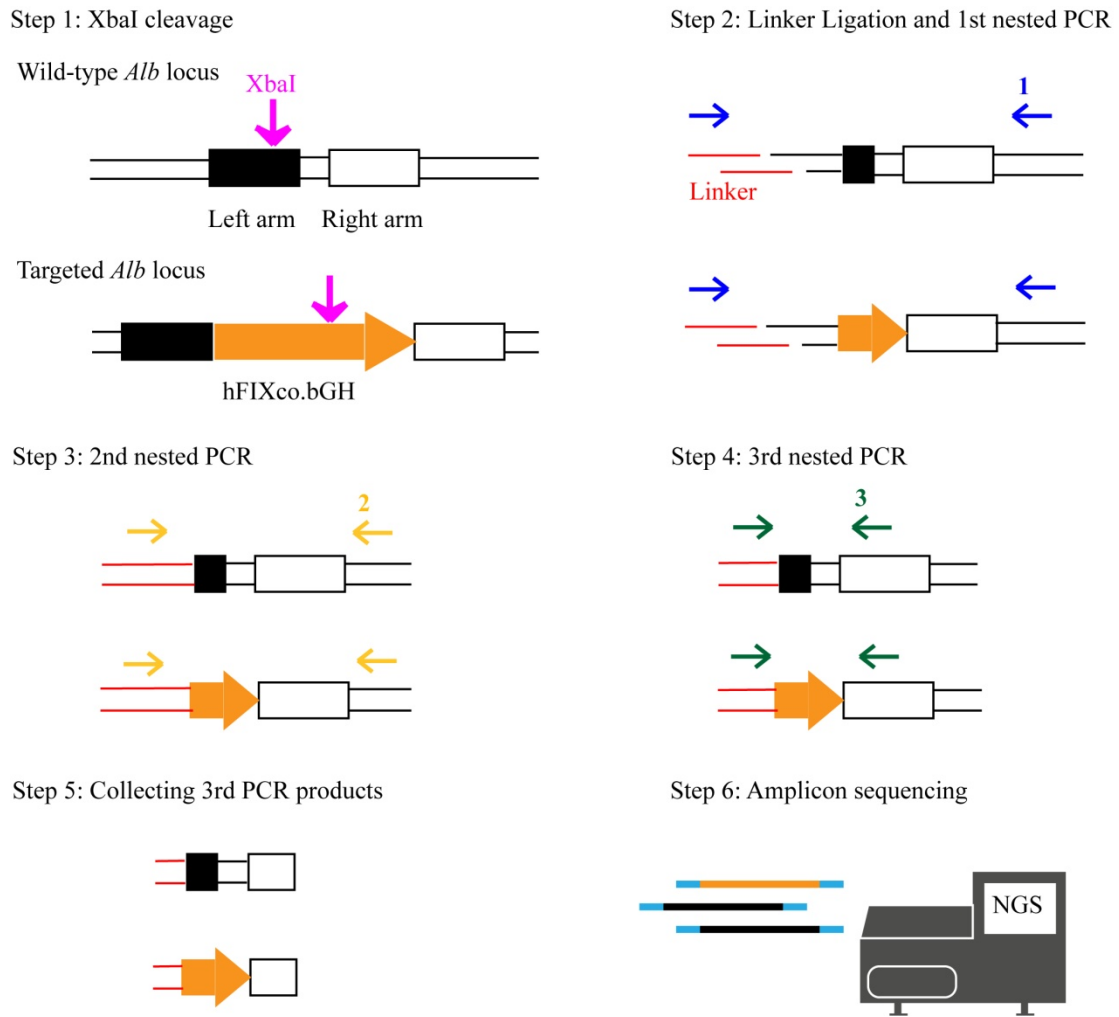

**Supplemental Figure 2 Scheme of integration rate assessment.**

Assessment of on-target integration rate begins using XbaI digesting genomic DNA at (step 1). XbaI compatible linker (red) is then ligated to the genomic locus but not to the vector followed by the first round of nested PCR amplification (primer 1 in blue) (step 2). The length of first round of PCR products are similar in both targeted and wild-type alleles, thus allowing for unbiased amplification followed by nest two rounds of nested PCR amplifications (primer 2 in yellow (step 3), and then primer 3 in green (step 4)). The amplicons of the third nested PCR then serve as a template and subject for NGS (step 5 and step 6). The HDR-mediated

gene integration rate is determined by the percentage of reads containing the expected hFIXco sequence among the total mapped reads.

## Supplemental Tables

Supplemental Table 1. Off-target analysis. Potential off-target sequences for Albumin sgRNA4 identified and scored by Benchling's off-target analysis.

| ID     | Sequence             | PAM | Score   | Chromosome | Strand | Position  | Mismatches | On-target |
|--------|----------------------|-----|---------|------------|--------|-----------|------------|-----------|
| sgRNA4 | GTAAATATCTACTAAGACAA | TGG | 100.000 | chr5       | -1     | 90461429  | 0          |           |
| OT1    | TTAAATATCAACTAAGACAA | TAG | 7.415   | chr2       | 1      | 14017575  | 2          | FALSE     |
| OT2    | CTAAATATATACTAAGACAA | GGG | 4.607   | chr8       | 1      | 105884816 | 2          | FALSE     |
| OT3    | TTAAATACCAACTAAGACAA | CAG | 2.738   | chrX       | 1      | 37895074  | 3          | FALSE     |
| OT4    | TTAAATACCAACTAAGACAA | CAG | 2.738   | chrX       | -1     | 37833846  | 3          | FALSE     |
| OT5    | ATAAGTATCTGCTAAGACAA | CAG | 1.715   | chr14      | -1     | 27934452  | 3          | FALSE     |
| OT6    | TGAAATATCTTCTAAGACAA | AGG | 1.715   | chrX       | -1     | 52027245  | 3          | FALSE     |
| OT7    | CTAAGTATCTAATAAGACAA | AGG | 1.582   | chr1       | -1     | 47526830  | 3          | FALSE     |
| OT8    | CCAAATATCTAGTAAGACAA | AAG | 1.582   | chr15      | -1     | 69401691  | 3          | FALSE     |
| OT9    | GTATGTATATACTAAGACAA | TGG | 1.579   | chr5       | 1      | 58977566  | 3          | FALSE     |
| OT10   | GAAATTATCTACTAAGTCAA | TGG | 1.478   | chr14      | -1     | 100457044 | 3          | FALSE     |

Supplemental Table 2. Primers and sequences for construction of plasmids and analysis of gene target and expression.

| Name               | Sequence                                   | Note                                        |
|--------------------|--------------------------------------------|---------------------------------------------|
| Albumin sgRNA1_Fwd | CACCGCATCTTCAGGGAGTAGCTT                   | Albumin target sequence 1                   |
| Albumin sgRNA1_Rev | AAACAAGCTACTCCCTGAAGATGC                   |                                             |
| Albumin sgRNA2_Fwd | CACCGCACAGATATAAACACTTAA                   | Albumin target sequence 2                   |
| Albumin sgRNA2_Rev | AAACTTAAGTGTTTATATCTGTGC                   |                                             |
| Albumin sgRNA3_Fwd | CACCGGAAAATCTGAAGGTGGCAA                   | Albumin target sequence 3                   |
| Albumin sgRNA3_Rev | AAACTTGCCACCTTCAGATTTTCC                   |                                             |
| Albumin sgRNA4_Fwd | CACCGTAAATATCTACTAAGACAA                   | Albumin target sequence 4                   |
| Albumin sgRNA4_Rev | AAACTTGTCTTAGTAGATATTTAC                   |                                             |
| mAlb_PointMF       | CCTGCTCGACCATGCTATACT                      | Albumin PCR for Surveyor and<br>NGS assay   |
| mAlb_PointMR       | CAGGCCTTTGAAATGTTGTT                       |                                             |
| Albumin_qPCR_Fwd   | TGGCAAAATGAAGTGGGTAA                       | Wild type mAlb qPCR primer                  |
| Albumin_qPCR_Rev   | GGGCGATCTCACTCTTGTGT                       |                                             |
| F9_qPCR_Fwd        | TGGCAAAATGAAGTGGGTAA                       | Chimeric m-hFIX qPCR primer                 |
| F9_qPCR_Rev        | TCTCGTGGTCCAGAAACACT                       |                                             |
| GAPDH_qPCR_Fwd     | AAGGTCATCCCAGAGCTGAA                       | GAPDH qPCR primer                           |
| GAPDH_qPCR_Rev     | CTGCTTCACCACCTTCTTGA                       |                                             |
| Cas9_qPCR_Fwd      | GGACTCCCGGATGAACACTA                       | SpCas9 qPCR and copy number<br>assay primer |
| Cas9_qPCR_Rev      | TCGCTTTCCAGCTTAGGGTA                       |                                             |
| Linker_Fwd         | GACCCGGGAGATCTGAATTCAGTGGC<br>ACAGCAGTTAGG | XbaI compatible Linker                      |
| Linker_Rev         | CTAGCCTAACTGCTGTGCCACTGAATT<br>CAGATC      |                                             |
| LM_P1              | GACCCGGGAGATCTGAATTC                       | LM nest PCR1                                |
| LM_P2              | CAAAACTATAGTTCATAGACCTTTCCA<br>G           |                                             |
| LM_P3              | GATCTGAATTCAGTGGCACAG                      | LM nest PCR2                                |
| LM_P4              | ATAAGATTCCAGACTTAACAAGTTAG<br>A            |                                             |
| LM_P5              | GGCACAGCAGTTAGGCTAGA                       | LM nest PCR3                                |
| LM_P6              | TCTGTGCATTCAAACCTCAAGAT                    |                                             |

Supplemental Table 3. PCR primer sequences for detecting potential off-target effects by NGS assay.

| Primer Name | Sequence                   | Note             |
|-------------|----------------------------|------------------|
| OT1_P1Fwd   | GCAAGGGCATAACCAGGACT       | Primers for OT1  |
| OT1_P1Rev   | TGCTGCTAAACTGCACTCCA       |                  |
| OT1_P2Fwd   | TACATGCATATGTGTTTCATGGACAC |                  |
| OT1_P2Rev   | GCCTTCTATACTCTTGCAACCATGT  |                  |
| OT2_P1Fwd   | GCAACCTTTTCACTGCGTCC       | Primers for OT2  |
| OT2_P1Rev   | CCTGGCCTGGGAATGGATAC       |                  |
| OT2_P2Fwd   | AGGTTCCAATGCCGAAAGCC       |                  |
| OT2_P2Rev   | TGCTCACCTCCCTCCTGACA       |                  |
| OT3_P1Fwd   | AGAATCTTAACTCCTCTGATACCG   | Primers for OT3  |
| OT3_P1Rev   | CCCTTTGCAAGCAAACAACG       |                  |
| OT3_P2Fwd   | GTCCCTTTCCTGACTGTCAGTGT    |                  |
| OT3_P2Rev   | GGGCAGAAGTATATGATGAATGTG   |                  |
| OT4_P1Fwd   | TTCATGGCCCTGTTCCATCC       | Primers for OT4  |
| OT4_P1Rev   | AGTCCTCTGATGCAGTGTC        |                  |
| OT4_P2Fwd   | GTCCTCTTCTGCACAGCT         |                  |
| OT4_P2Rev   | CAGCCCCAGACTTTCAGTCTT      |                  |
| OT5_P1Fwd   | AGCACTTGGCATGCTTGAAC       | Primers for OT5  |
| OT5_P1Rev   | TCCCAAGATGCATACCGTGC       |                  |
| OT5_P2Fwd   | GCCTCACTGTCTCTATGAGCCA     |                  |
| OT5_P2Rev   | ACATCTACCTGAATTCCTGTGAC    |                  |
| OT6_P1Fwd   | CTTCGGAATGCATCGAGCTG       | Primers for OT6  |
| OT6_P1Rev   | CCAGCAGAGCTATGTAGCCA       |                  |
| OT6_P2Fwd   | GCAGATCTCATCTCAAGTTATAGCT  |                  |
| OT6_P2Rev   | CCTTTGGTTTAGATAAGCTGATTC   |                  |
| OT7_P1Fwd   | CCAGGCTCAAGAGGACTCAG       | Primers for OT7  |
| OT7_P1Rev   | TGGGCTCTTAATGGTGGCTT       |                  |
| OT7_P2Fwd   | TTAGAATTTCCCTTGGAGTGTTCAG  |                  |
| OT7_P2Rev   | CAACTACACTATAGACCTGGGTTGA  |                  |
| OT8_P1Fwd   | CAGTTGGTCTGGCATAGGG        | Primers for OT8  |
| OT8_P1Rev   | CACGGACTGTAGGTGGGAAA       |                  |
| OT8_P2Fwd   | TCTGTCAGTCACAAGACCTCTGC    |                  |
| OT8_P2Rev   | GCAATCTATAATCTGGGAGATTGG   |                  |
| OT9_P1Fwd   | TGTGGCAAATGAGAGCGAAGT      | Primers for OT9  |
| OT9_P1Rev   | TGCCTGTGATTGATGAGCAAG      |                  |
| OT9_P2Fwd   | GTATTTTGATATACATCAGCCTCGA  |                  |
| OT9_P2Rev   | CTAACTAGCATCACATCAAACAAGA  |                  |
| OT10_P1Fwd  | ATGGGGCTCACGGTTTTTCT       | Primers for OT10 |
| OT10_P1Rev  | CGGGGTAAAGATCGCACTCA       |                  |
| OT10_P2Fwd  | ATTCTGCCCTAATTGCATAACTG    |                  |
| OT10_P2Rev  | GGAAATGAGAGCCTCTGGACA      |                  |
